# Supplementary material
Source: Springer Nature journal article supplement (https://www.springermedizin.de/resource/supplementary/12960_2007_112_MOESM4_ESM.pdf/9570436)

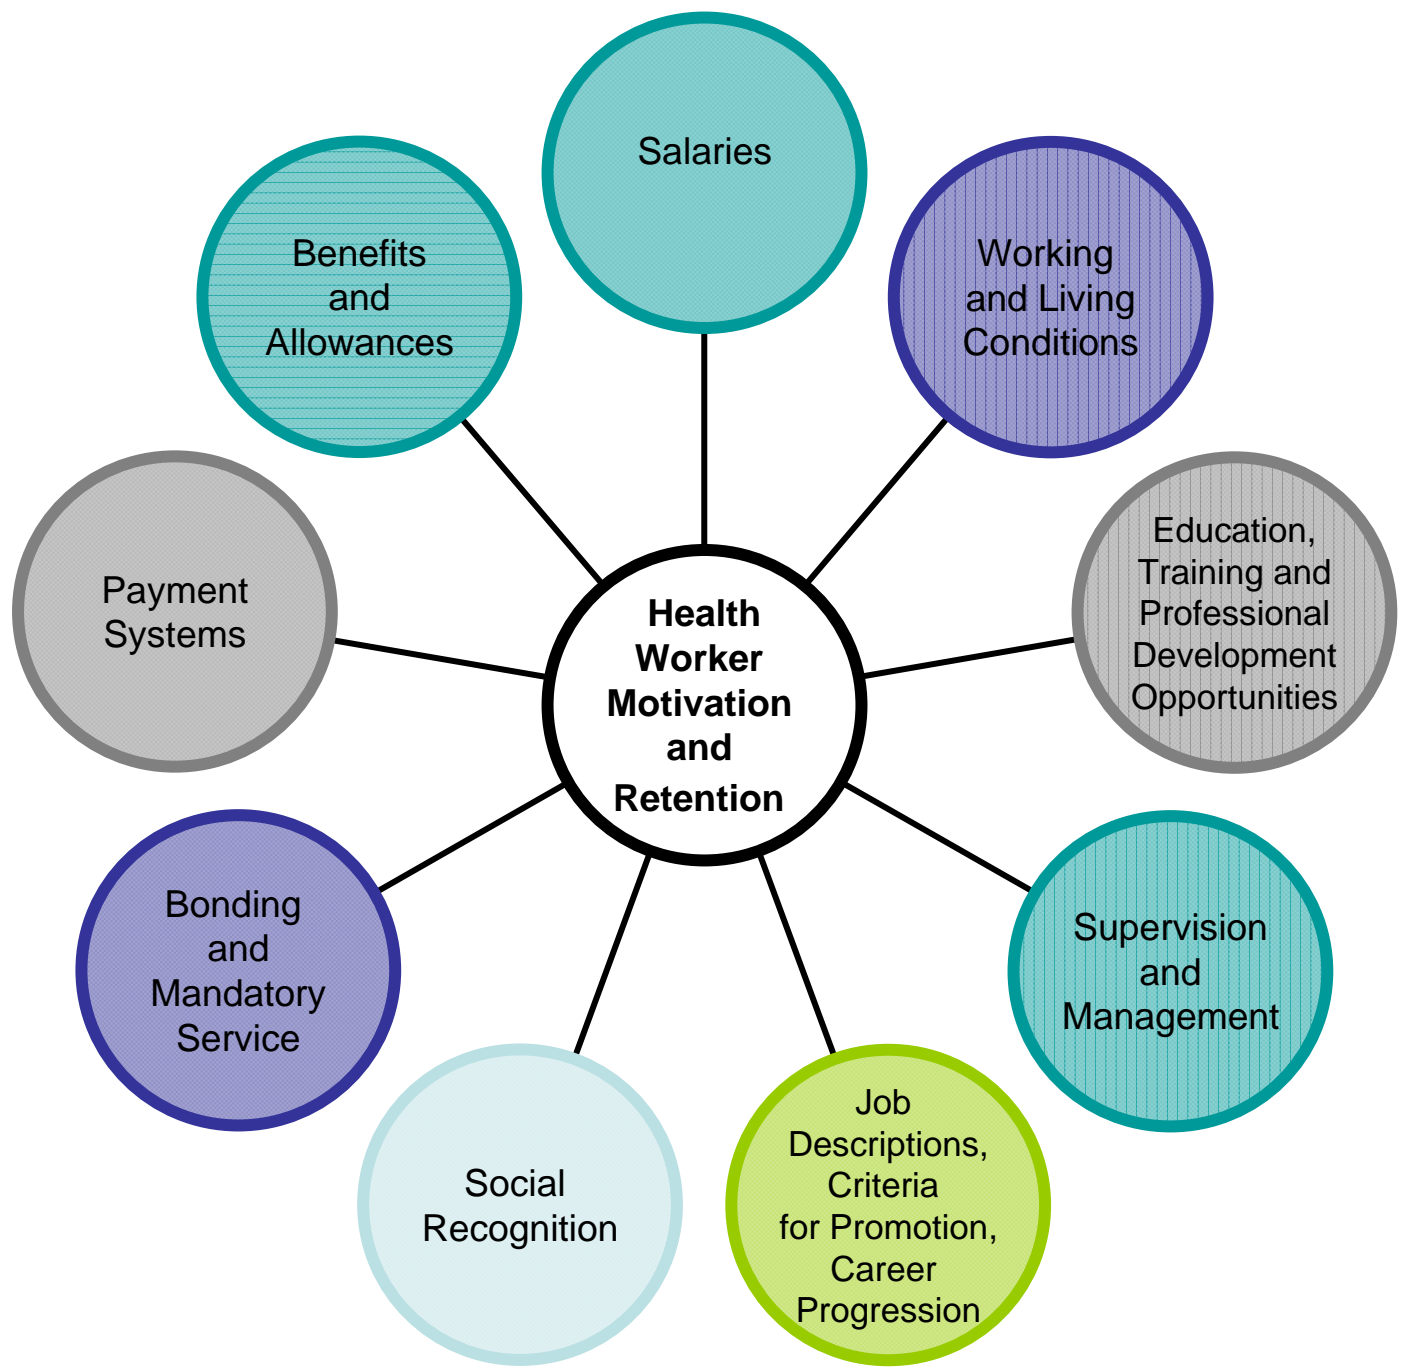

Supplement: MOESM4 [file 9570436]
